# Supplementary material for: Adsorption isotherms and kinetics for Pb( ii ) ion removal from aqueous solutions with biogenic metal oxide nanoparticles
Source: Royal Society of Chemistry journal article supplement (doi:10.1039/d3ra05347d), 2023-01-01
Supplement: d3ra05347d1.pdf [file d3ra05347d1.pdf]

Supporting information

## Adsorption isotherm and kinetic studies of Pb(II) ions removal from aqueous solutions using biogenic metal oxides nanoparticles

Anastassiya A. Mashentseva<sup>a,b\*</sup>, Nurgzhigit Seitzhapar<sup>a,b</sup>, Murat Barsbay<sup>c</sup>, Nurgulim A. Aimanova<sup>a</sup>, Assel N. Alimkhanova<sup>a,b</sup>, Dmitriy A. Zheltov<sup>a</sup>, Alisher M. Zhumabayev<sup>a,b</sup>, Bakhtiyar S. Temirgaziev<sup>d</sup>, Alimzhan A. Almanov<sup>a,b</sup> and Daniyar T. Sadyrbekov<sup>d</sup>

<sup>a</sup>The Institute of Nuclear Physics of the Republic of Kazakhstan, Almaty 050032, Kazakhstan

<sup>b</sup>Department of Nuclear physics, new materials and technologies, L.N. Gumilyov Eurasian National University, 010008 Astana, Kazakhstan

<sup>c</sup>Hacettepe University, Institute of Science, Polymer Science and Technology Division, Beytepe, 06800, Ankara, Turkey

<sup>d</sup>NPJSC E.A. Buketov Karaganda University, 100024 Karaganda, Kazakhstan

\*Corresponding author, e-mail: [a.mashentseva@inp.kz](mailto:a.mashentseva@inp.kz)

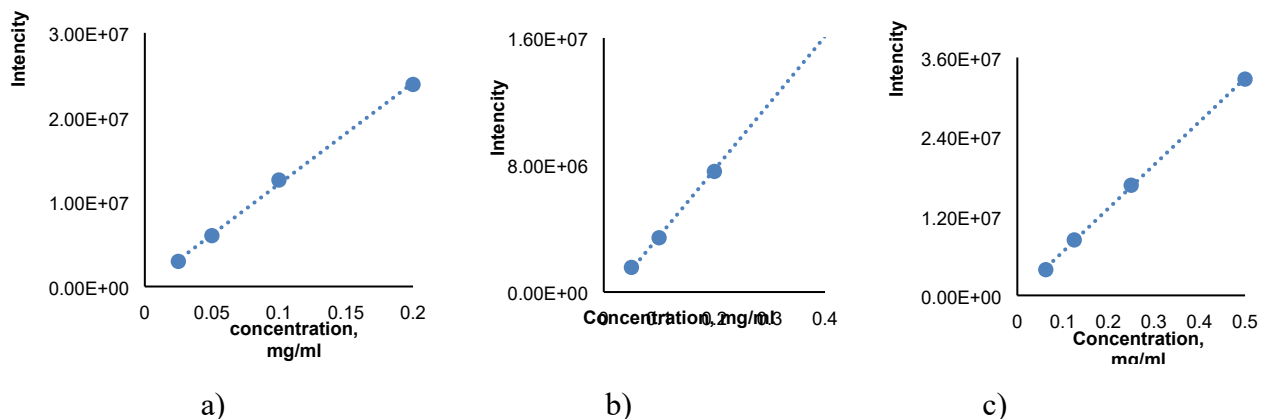

Figure S1. HPLC calibration curves for standard compounds: pinostrobin (a), rutin (b) and quercetin (c)

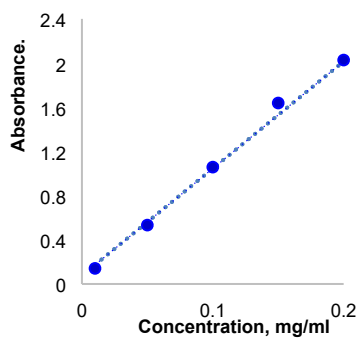

a)

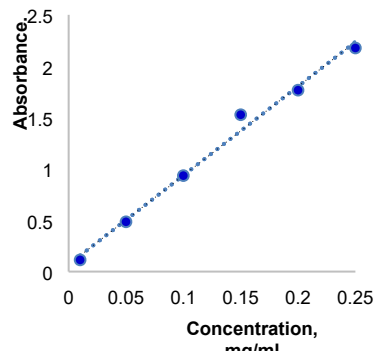

b)

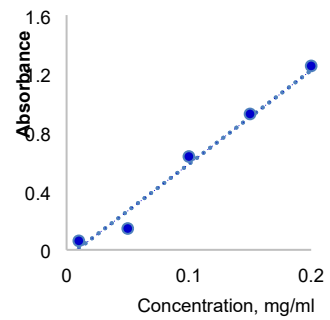

c)

Figure S2. Folin-Ciocalteu assay calibration curves for standard compounds: gallic (a), protocatechuic (b) and caffeic (c) acids
